# Supplementary material for: Biosynthetic Conversion of Ag+ to highly Stable Ag0 Nanoparticles by Wild Type and Cell Wall Deficient Strains of Chlamydomonas reinhardtii
Source: PubMed Central journal article supplement (PMC6337529; doi:10.3390/molecules24010098), 2018-12-28
Supplement: molecules-24-00098-s001.pdf [file molecules-24-00098-s001.pdf]

**Supplementary Materials:** The following are available online at [www.mdpi.com/xxx/s1](http://www.mdpi.com/xxx/s1)

Cell density, extracted chlorophyll, absorbance and quantum efficiency were measured for both the WT and CWD strains to maintain consistency in the experiment. The cell density was measured using a hemocytometer (0.0025 mm<sup>2</sup>, 0.1000 mm) and a Nikon Labophot-2 light-microscope. The maximum quantum efficiency of photosystem II ( $\Phi_{PSII}$ ), an indication of cell culture health and photonic to chemical energy conversion, was determined by PAM fluorometry using a Z985 Cuvette Aquapen Fluorometer (Qubit Biology Inc., Kingston, Ontario, Canada), when the Kautsky Induction (OJIP) curves were recorded for 5 s according to the manufacturer's protocol. The samples were dark adapted for 10 minutes before each measurement.

**Table S1.** The characteristic cell culture parameters.

| Parameters                                     | Wild Type (WT)       | Cell Wall Deficient (CWD) |
|------------------------------------------------|----------------------|---------------------------|
| age of culture (days)                          | 21                   | 21                        |
| average cell density (cells mL <sup>-1</sup> ) | 1.90·10 <sup>6</sup> | 1.84·10 <sup>6</sup>      |
| absorbance of chlorophyll <i>a</i> at 663 nm   | 0.516                | 0.466                     |
| quantum efficiency $\Phi_{PSII}$ (at t=0)      | 0.558                | 0.552                     |

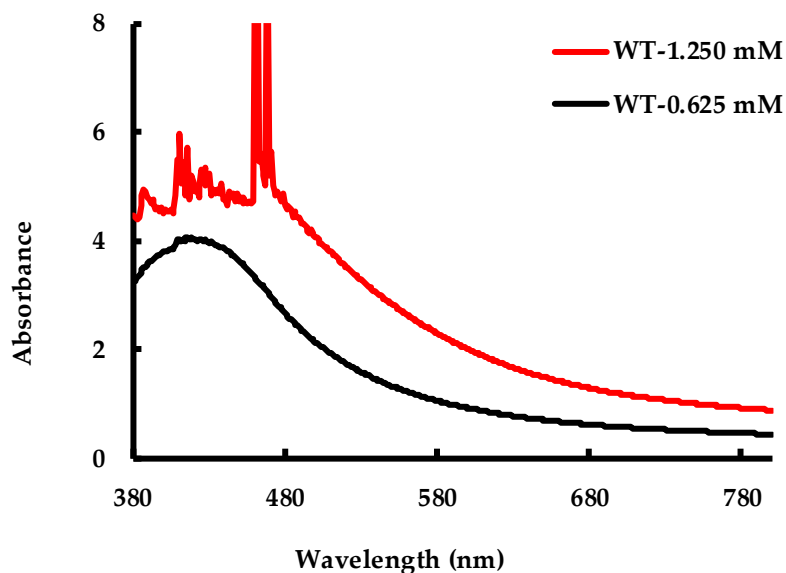

**Figure S1.** Saturated spectrophotometer reading by crude samples of WT-1.250 mM and WT-0.625 mM.

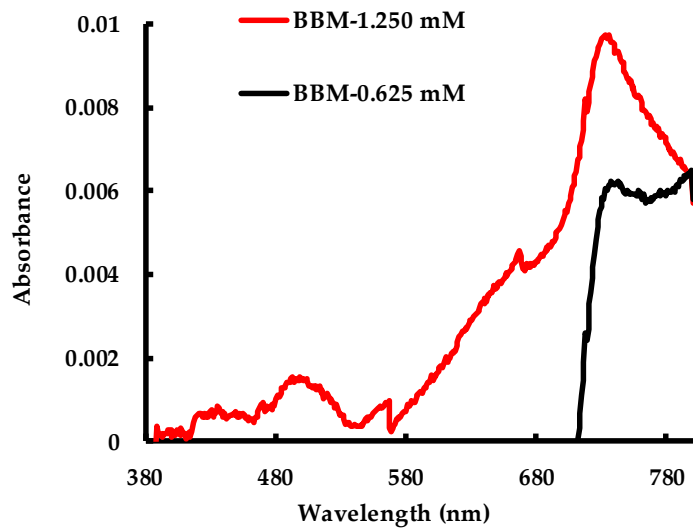

Figure S2. Spectrophotometric measurements of BBM + 1.250 mM and BBM + 0.625 mM.

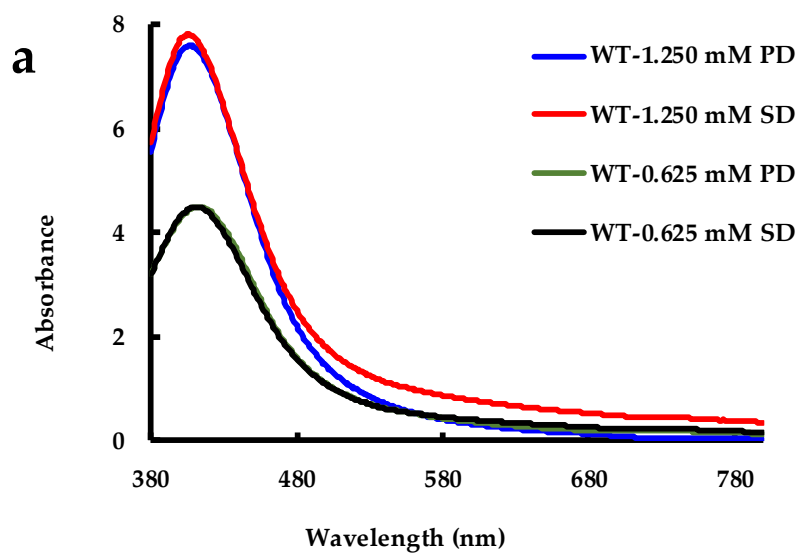

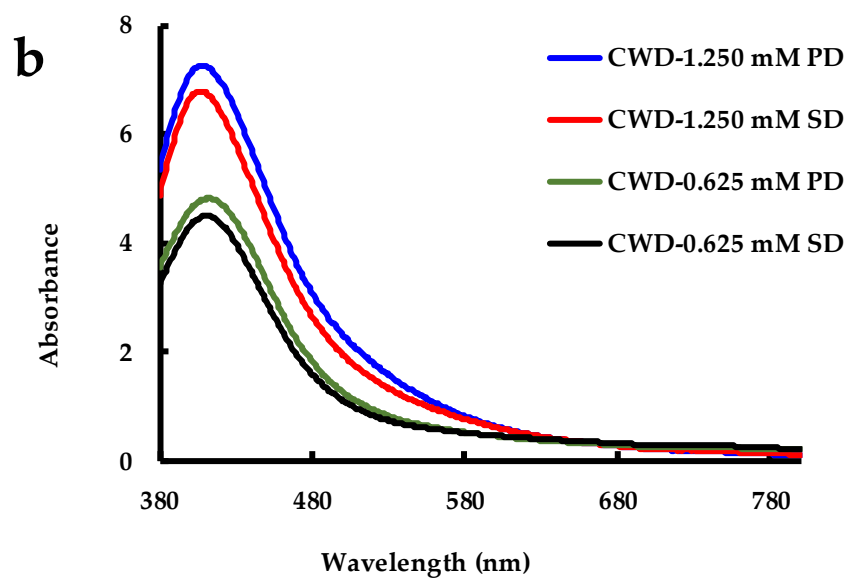

**Figure S3.** Spectrophotometric measurements of AgNPs, (a) produced by the Wild Type (WT) strain; and (b) produced by the Cell Wall Deficient (CWD) strain, being exposed to NaCl solutions for 72 h.
